# Supplementary material for: Fluorinase mediated chemoenzymatic synthesis of [18F]-fluoroacetate
Source: Royal Society of Chemistry journal article supplement (doi:10.1039/c0cc02264k), 2010-01-01
Supplement: c0cc02264k.pdf [file c0cc02264k.pdf]

## Electronic Supplementary Information

# Fluorinase mediated chemoenzymatic synthesis of [<sup>18</sup>F]- fluoroacetate

Xiang-Guo Li,<sup>\*a,b</sup> Juozas Domarkas,<sup>c</sup> David O'Hagan<sup>\*a</sup>

<sup>a</sup> University of St Andrews, School of Chemistry and Centre for Biomolecular Sciences, North Haugh, St Andrews, Fife, UK KY16 9ST. E-mail: dol@st-andrews.ac.uk; Fax: + 44 01334 463800; Tel: +44 01334 467171

<sup>b</sup> Department of Pharmacology, Drug Development and Therapeutics/Laboratory of Synthetic Drug Chemistry, Institute of Biomedicine, University of Turku, Lemminkaisenkatu 5C, 20520 Turku, Finland. E-mail: xiali@utu.fi

<sup>c</sup> John Mallard Scottish PET Centre, School of Medical Sciences, University of Aberdeen, Foresterhill, Aberdeen, UK AB25 2ZD

### 1. Materials

L-Amino acid oxidase (L-AAO, EC 1.4.3.2, *Crotalus adamanteus*, Type I, 0.3 unit/mg), S-adenosyl-L-methionine (SAM) and Standard sodium fluoroacetate (PESTANAL<sup>®</sup>, analytical standard) were purchased from Sigma-Aldrich Co., UK. A reference sample of 5'-fluorodeoxyadenosine **2** was chemically synthesised following procedures described earlier.<sup>1,2</sup> Fluoride-18 production was conducted in a CTI RDS-111 cyclotron (CTI/Siemens) and radioactivity was measured using a Capintec well reader (CRC-15R).

### 2. Fluorinase expression and purification

Recombinant fluorinase (EC 2.5.1.63) was expressed and purified according to the known method with slight modifications.<sup>3</sup> In detail the methods used were; *E. coli* BL21 (DE3) was transformed with pET28-flA which was grown in Luria broth (1L) containing kanamycin (0.1 mg mL<sup>-1</sup>) at 37°C until an absorbance of 0.6 at 600 nm was observed. Over-expression of the fluorinase was induced by adding isopropylthiogalactoside (IPTG) to a final concentration of 0.2 mM and the incubation continued at 30 °C for 15h. The cells were collected and lysed. After centrifugation, the cell lysate was applied to a column packed with Ni<sup>2+</sup>-charged His-Bind resin (Novagen). The fluorinase was eluted from the column with Tris-HCl buffer (20 mM, pH 8) containing NaCl (0.4 M) and imidazole (0.4 M). The protein was further purified by size-exclusion fast protein liquid chromatography (FPLC) on a Superdex S-200 (HR 16/60) column (Pharmacia Biotech) and concentrated using a Millipore concentrator. The final concentration of pure protein was 23 mg mL<sup>-1</sup> (43 mg in total) determined using a Nanodrop ND1000 spectrophotometer. SDS-polyacrylamide gel electrophoresis was used to confirm enzyme purity.

### 3. Synthesis of “cold” fluoroacetate (optimisation)

An oxidation mixture was prepared by adding  $\text{CrO}_3$  (1g) to a solution of concentrated  $\text{H}_2\text{SO}_4$  (1 mL) in  $\text{H}_2\text{O}$  (2.5 mL). In a typical experiment, 100  $\mu\text{L}$  of the FDA solution (9.5 mg/mL) was added to the oxidation mixture (250  $\mu\text{L}$ ) in a sealed 5 mL Wheaton V-vial and heated at 100-160 $^\circ\text{C}$  for 5 – 50 min. Then the reaction was cooled in a water-ice bath, diluted with water (1-2 mL) and the [ $^{18}\text{F}$ ]-fluoroacetic acid was extracted into diethyl ether ( $5 \times 1$  mL). The combined ether extracts were passed through a Sep-Pak Light Si cartridge to remove sulfate and chromate ions and the cartridge was washed with diethyl ether (1 mL). The combined extracts were then washed with aq.  $\text{Na}_2\text{CO}_3$  (0.5 mL, 8 mg/mL) to secure the product in the aqueous phase as Na [ $^{18}\text{F}$ ]-fluoroacetate and the resulting solution was analysed by HPLC.

HPLC analysis was performed on Dionex HPLC system composed of IP25 isocratic pump, automated injection loop (25  $\mu\text{L}$ ), HPLC column (Hamilton PRP-X100,  $150 \times 3.00$  mm), an anion suppressor (Dionex ASRS300, 4 mm) and a conductivity detector connected in series. Elution of all anions was achieved at a 1.5 mL/min flow of aq.  $\text{Na}_2\text{CO}_3$  (1.5 mM) solution for 10 min and the nature of the ions was confirmed by standard sodium salt solutions: carbonate ( $R_t = 1.6$  min); co-eluting bicarbonate and formate ( $R_t = 5.0$  min and 5.6 min) and fluoroacetate ( $R_t = 7.7$  min).

A commercial standard of sodium fluoroacetate (PESTANAL<sup>®</sup>, analytical standard, purity 99.3%) was used as a reference for the calibration of fluoroacetate. An eight point calibration curve ( $R^2 = 0.997$ ) correlating the area under the curve (AUC) to the FAc concentration (over the 1-134 nmol range) was generated. Yields were thus calculated and plotted against time for all of the oxidation temperatures explored (see Fig 1).

### 4. Synthesis of [ $^{18}\text{F}$ ]- 2

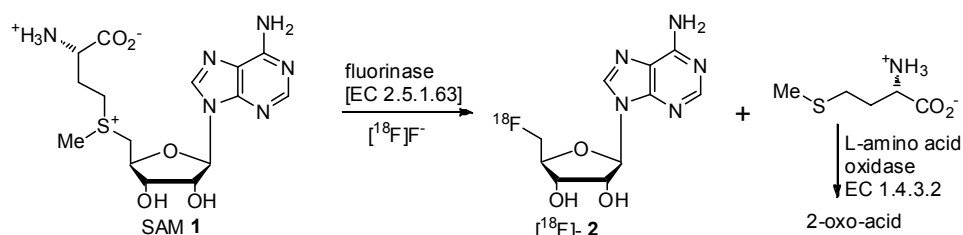

In a typical experiment, the fluorinase (30-40  $\mu\text{L}$ , 23 mg/mL) was added to a mixture of SAM 1 (15  $\mu\text{L}$ , 20 mM), L-AAO (1 mg), [ $^{18}\text{F}$ ]-F<sup>-</sup> (20-30  $\mu\text{L}$ , 130-160 MBq) and incubated at 37 $^\circ\text{C}$  with magnetic stirring for 1h. Then water (50  $\mu\text{L}$ ) was added and the enzymes denatured by heating on a boiling water bath for 3 min, followed by centrifugation of the precipitated protein (14.500 rpm, 4 min). This gave the supernatant (~80-100  $\mu\text{L}$ ) containing [ $^{18}\text{F}$ ]-FDA which was used directly in the next step. For quality control, 2  $\mu\text{L}$  of the reaction mixture were diluted with water (50  $\mu\text{L}$ ), processed as described above, and a 20  $\mu\text{L}$  aliquot was injected into a Gyncotek HPLC system (manual injection loop (100  $\mu\text{L}$ ), dual head pump, column (Phenomenex Luna C-18(2),  $250 \times 4.60$  mm, 5 micron) and UV (UVD340S)) with a NaI single crystal radioactive detector connected in series. [ $^{18}\text{F}$ ]-F<sup>-</sup> ( $R_t = 3.4$  min, confirmed by [ $^{18}\text{F}$ ]-F<sup>-</sup> standard) and [ $^{18}\text{F}$ ]-FDA 2 ( $R_t = 10.0$  min, confirmed by a cold standard) was eluted at a 1 mL/min gradient flow of a ethanol in water (2.5% to 25% in 13 min). Depending

on the fluorinase and the [ $^{18}\text{F}$ ]- $\text{F}^-$  concentration in the reaction media, [ $^{18}\text{F}$ ]- $\text{F}^-$  incorporation levels were 90-99%.

## 5. Synthesis of [ $^{18}\text{F}$ ]-fluoroacetate

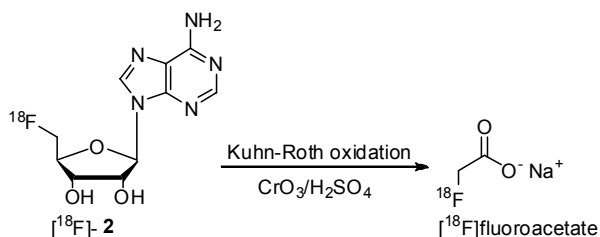

An oxidation mixture was prepared by adding  $\text{CrO}_3$  (1g) to a solution of concentrated  $\text{H}_2\text{SO}_4$  (1 mL) in  $\text{H}_2\text{O}$  (2.5 mL). The [ $^{18}\text{F}$ ]-**2** solution (80-100  $\mu\text{L}$ ), obtained as described above, was added to the oxidation mixture (250  $\mu\text{L}$ ) in a sealed 5 mL Wheaton V-vial at room temperature. The vessel was heated at  $140^\circ\text{C}$  for 20 min, then cooled for 1-2 min in a water-ice bath. Water (1-2 mL) was added and the [ $^{18}\text{F}$ ]-fluoroacetic acid was extracted into diethyl ether ( $5 \times 1$  mL). The combined ether extracts were passed through a Sep-Pak Light Si cartridge to remove sulfate and chromate ions and the cartridge was washed with diethyl ether (1 mL). The combined extracts were then washed with aq.  $\text{Na}_2\text{CO}_3$  (0.5 mL, 8 mg/mL) to secure the product in the aqueous phase as Na [ $^{18}\text{F}$ ]-fluoroacetate and the level of radiolabelling assessed by HPLC.

HPLC analysis was performed as previously described on a Dionex HPLC system with a NaI single crystal radioactivity detector connected to the column effluent. Two radioactive compounds were detected and identified as [ $^{18}\text{F}$ ]- $\text{F}^-$  ( $R_t = 3.1$  min) and [ $^{18}\text{F}$ ]- $\text{FAC}^-$  ( $R_t = 6.8$  min)(*n.b.* as the radioactive detector sits before the conductivity detector, retention times are reduced compare to those of the unlabelled standards)

For the calculation of decay-corrected RCY, all radioactive fractions were collected and their radioactive content recorded in the Capintec well reader (CRC-15PET).

## References

1. M. Onega, R. P. McGlinchey, H. Deng, J. T. G. Hamilton and D. O'Hagan, *Bioorg. Chem.*, 2007, **35**, 375-385.
2. T. D. Ashton and P. J. Scammells, *Bioorg. Med. Chem. Lett.*, 2005, **15**, 3361.
3. C. Dong, F. Huang, H. Deng, C. Schaffrath, J. B. Spencer, D. O'Hagan and J. H. Naismith, *Nature*, 2004, **427**, 561.
